# Supplementary material for: Learning deep abdominal CT registration through adaptive loss weighting and synthetic data generation
Source: PubMed Central journal article supplement (PMC9956065; doi:10.1371/journal.pone.0282110), 2023-02-24
Supplement: pone.0282110.s003.pdf [file pone.0282110.s003.pdf]

### **S3: Training curves**

Javier Pérez de Frutos<sup>1\*</sup>, André Pedersen<sup>1,2,3</sup>, Egidijus Pelanis<sup>4</sup>, David Bouget<sup>1</sup>, Shanmugapriya Survarachakan<sup>5</sup>, Thomas Langø<sup>1,6</sup>, Ole-Jakob Elle<sup>4</sup>, and Frank Lindseth<sup>5</sup>

<sup>1</sup>Department of Health Research, SINTEF, Trondheim, Norway

<sup>2</sup>Department of Clinical and Molecular Medicine, Norwegian University of Science and University (NTNU), Trondheim, Norway

<sup>3</sup>Clinic of Surgery, St. Olavs hospital, Trondheim University Hospital, Trondheim, Norway

<sup>4</sup>Intervention Centre, Oslo University Hospital, Oslo, Norway

<sup>5</sup>Department of Computer Science, Norwegian University of Science and University (NTNU), Trondheim, Norway

<sup>6</sup>Research Department, Future Operating Room, St. Olavs hospital, Trondheim University Hospital, Trondheim, Norway

\*Corresponding author: Javier Pérez de Frutos, javier.perezdefrutos@sintef.no

## **Document description**

This document contains figures showing the training curves, as well as figures related to the adaptive loss weighting.

### **Training curves**

Figs. A - D show training and validation losses for the six different configurations described in the main manuscript, for the IXI and Oslo-CoMet datasets (see Table 1, Section 2.5). Furthermore, training runtime of 160 epochs is shown as part of the legends of both figures for reference.

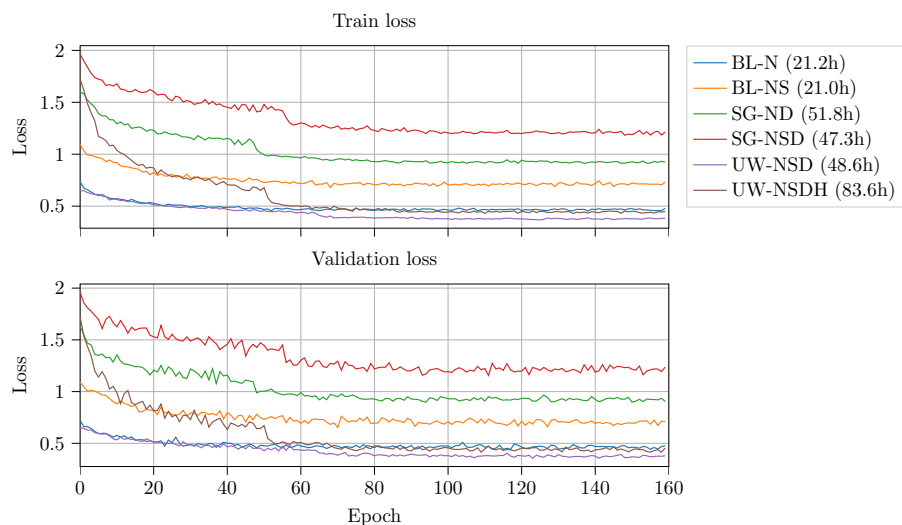

**Figure A. Train and validation loss of the models trained on the IXI dataset.**

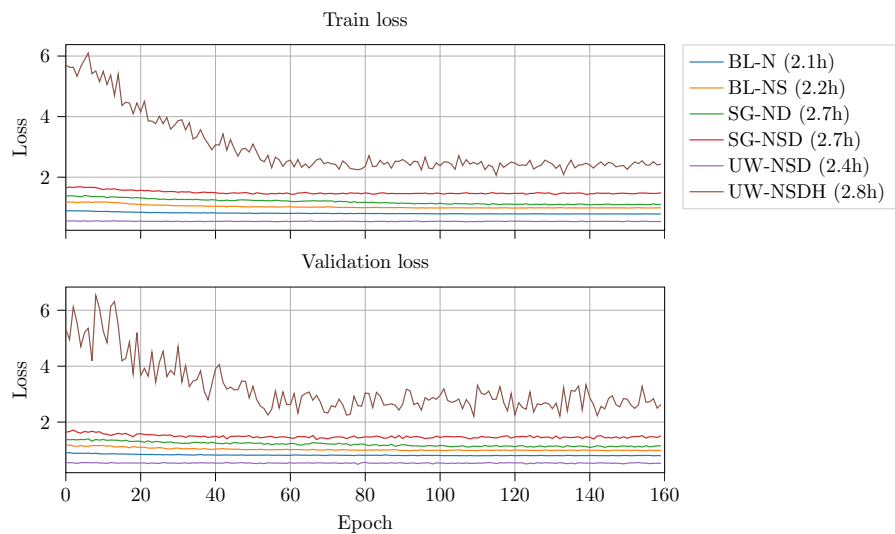

**Figure B. Train and validation loss of the models trained on the Oslo-CoMet dataset.**

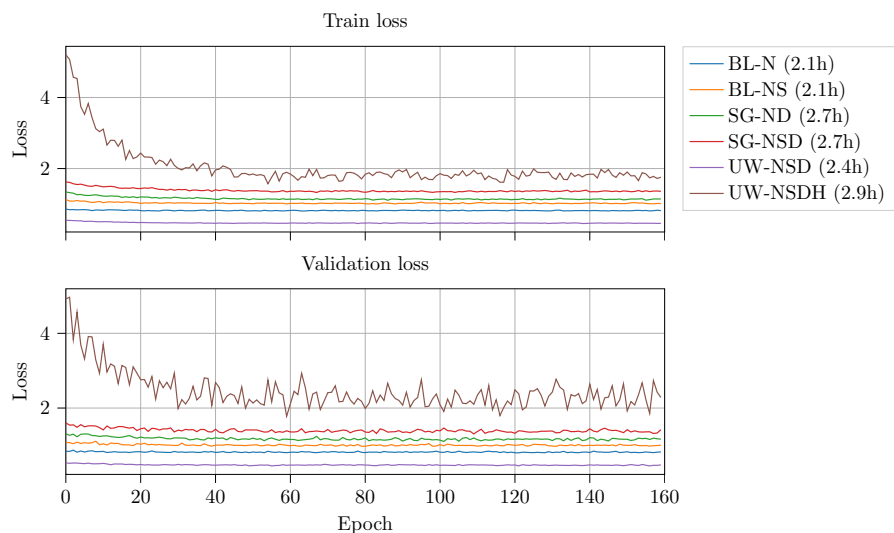

**Figure C.** Train and validation loss of the models trained on the Oslo-CoMet dataset from finetuning the entire architecture.

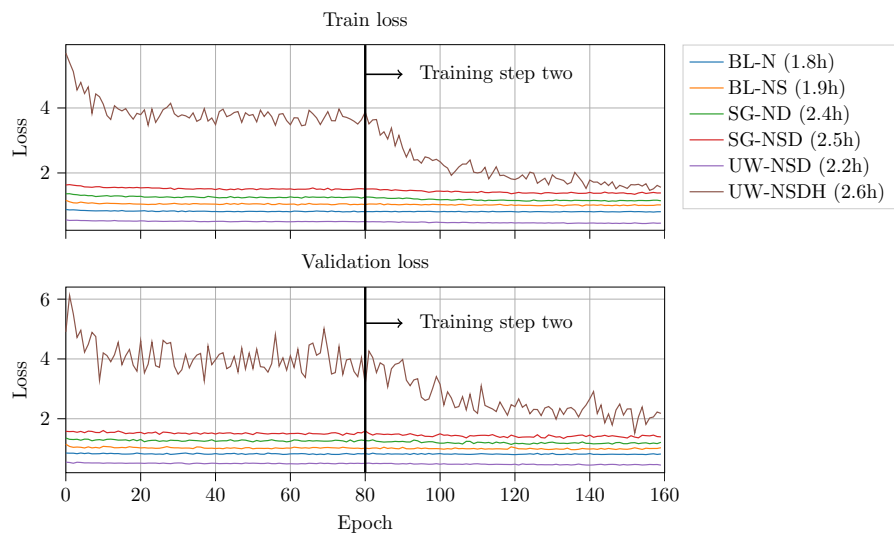

**Figure D.** Train and validation loss of the models trained on the Oslo-CoMet dataset from finetuning in two steps.

## Adaptive loss weighting results

Figs. E - L show the evolution of the dynamic weight in the UW models for the studied cases.

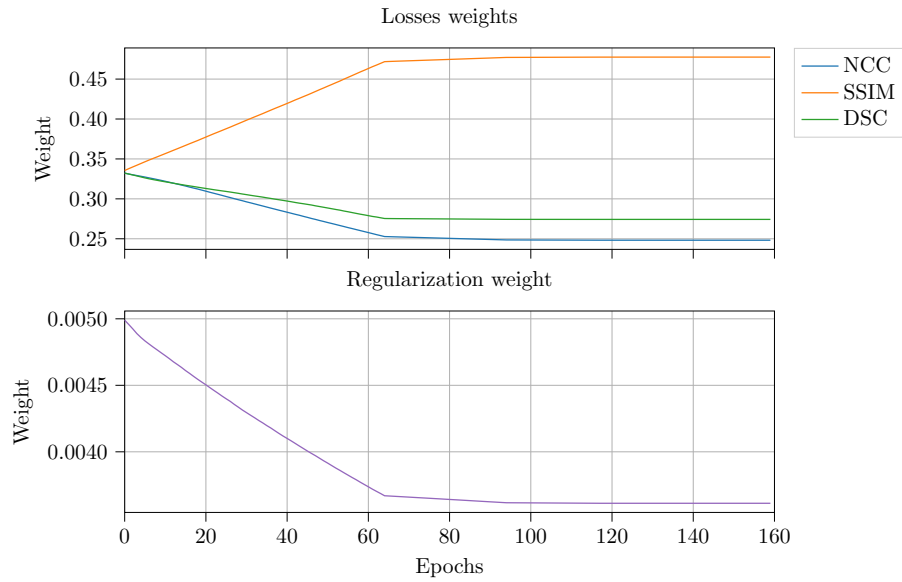

Figure E. Loss weights of the model UW-NSD trained on the IXI dataset.

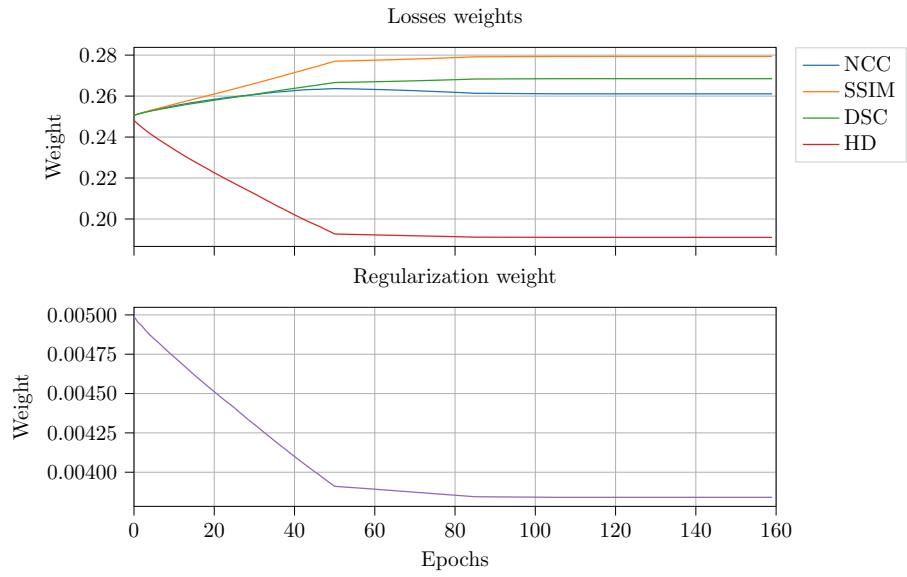

**Figure F.** Loss weights of the model UW-NSDH trained on the IXI dataset.

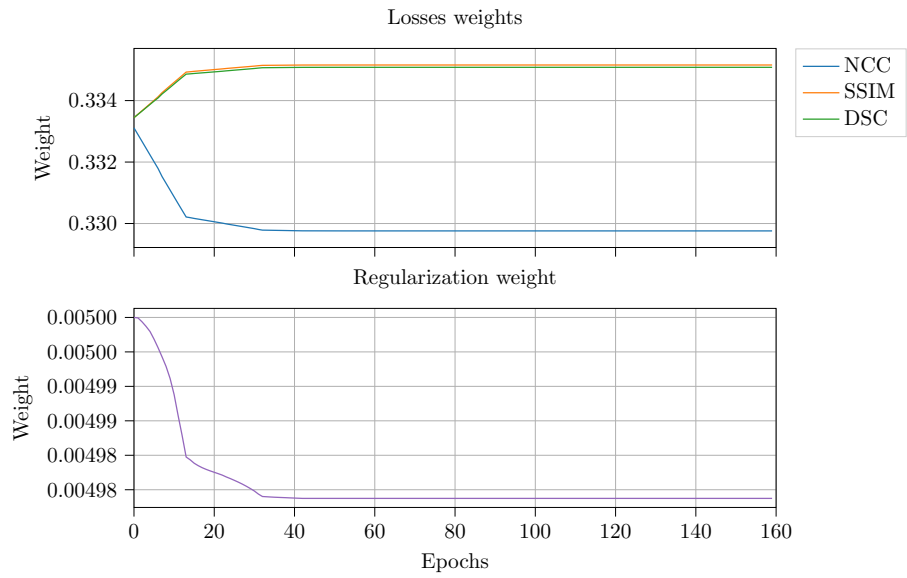

**Figure G.** Loss weights of the model UW-NSD trained on the Oslo-CoMet dataset.

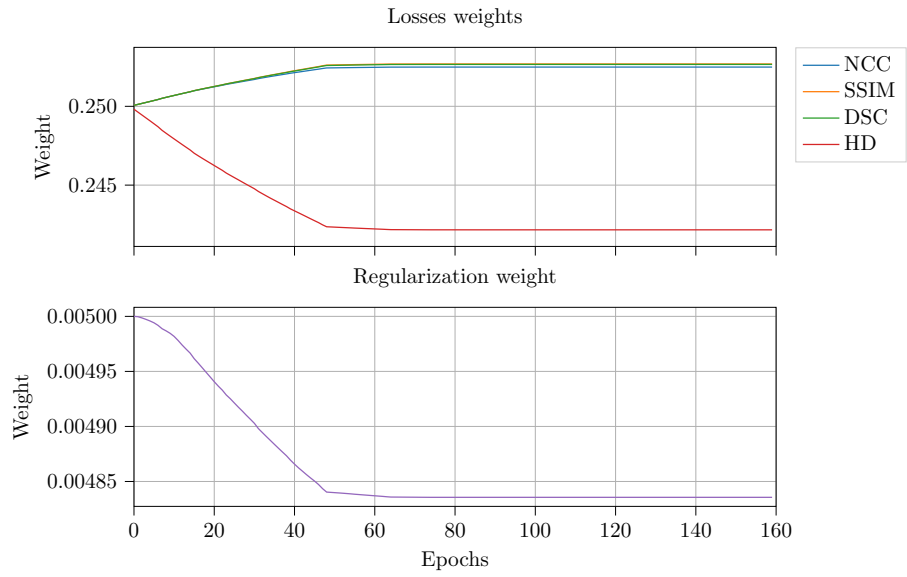

**Figure H.** Loss weights of the model UW-NSDH trained on the Oslo-CoMet dataset.

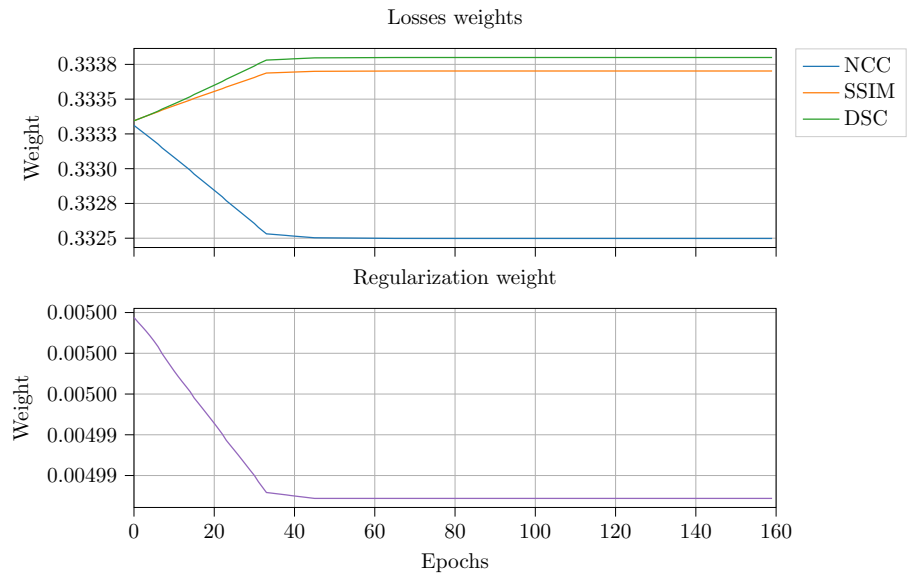

**Figure I.** Loss weights of the model UW-NSD trained on the Oslo-CoMet dataset from finetuning the entire architecture.

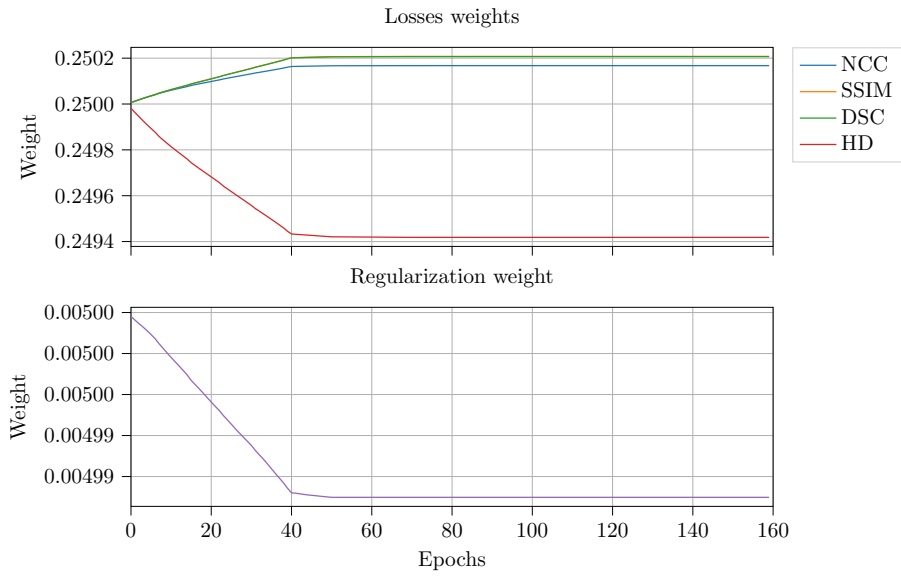

**Figure J.** Loss weights of the model UW-NSDH trained on the Oslo-CoMet dataset from finetuning the entire architecture.

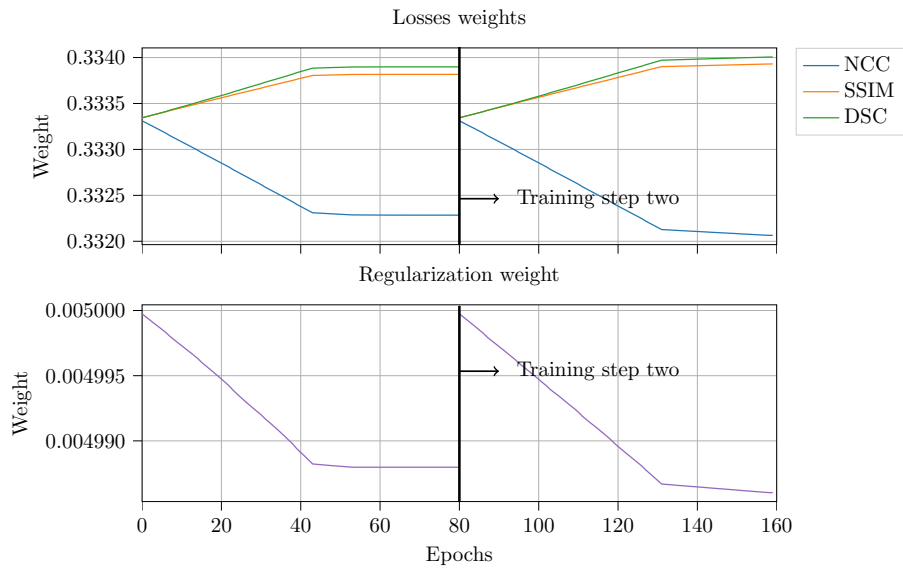

**Figure K.** Loss weights of the model UW-NSD trained on the Oslo-CoMet dataset from finetuning in two steps.

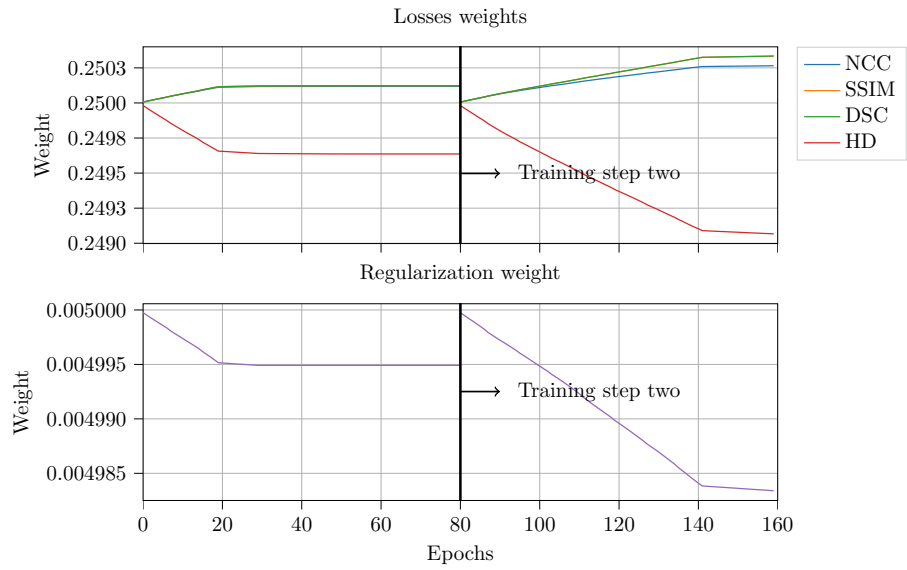

**Figure L. Loss weights of the model UW-NSDH trained on the Oslo-CoMet dataset from finetuning in two steps.**
