# Supplementary material for: Learning deep abdominal CT registration through adaptive loss weighting and synthetic data generation
Source: PubMed Central journal article supplement (PMC9956065; doi:10.1371/journal.pone.0282110), 2023-02-24
Supplement: pone.0282110.s005.pdf [file pone.0282110.s005.pdf]

### S5: Qualitative results

Javier Pérez de Frutos<sup>1\*</sup>, André Pedersen<sup>1,2,3</sup>, Egidijus Pelanis<sup>4</sup>, David Bouget<sup>1</sup>, Shanmugapriya Survarachakan<sup>5</sup>, Thomas Langø<sup>1,6</sup>, Ole-Jakob Elle<sup>4</sup>, and Frank Lindseth<sup>5</sup>

<sup>1</sup>Department of Health Research, SINTEF, Trondheim, Norway

<sup>2</sup>Department of Clinical and Molecular Medicine, Norwegian University of Science and University (NTNU), Trondheim, Norway

<sup>3</sup>Clinic of Surgery, St. Olavs hospital, Trondheim University Hospital, Trondheim, Norway

<sup>4</sup>Intervention Centre, Oslo University Hospital, Oslo, Norway

<sup>5</sup>Department of Computer Science, Norwegian University of Science and University (NTNU), Trondheim, Norway

<sup>6</sup>Research Department, Future Operating Room, St. Olavs hospital, Trondheim University Hospital, Trondheim, Norway

\*Corresponding author: Javier Pérez de Frutos, javier.perezdefrutos@sintef.no

## Document description

This document contains examples of predictions on the IXI and Oslo-CoMet test datasets.

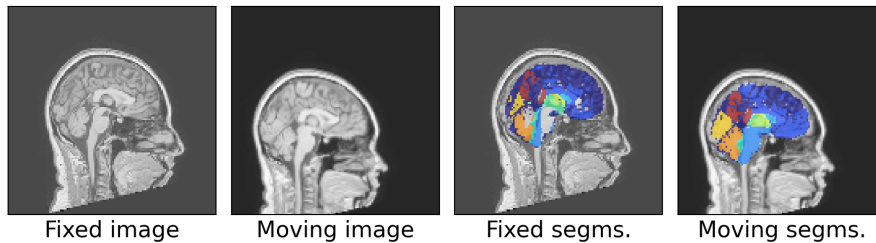

(a) Sample test image.

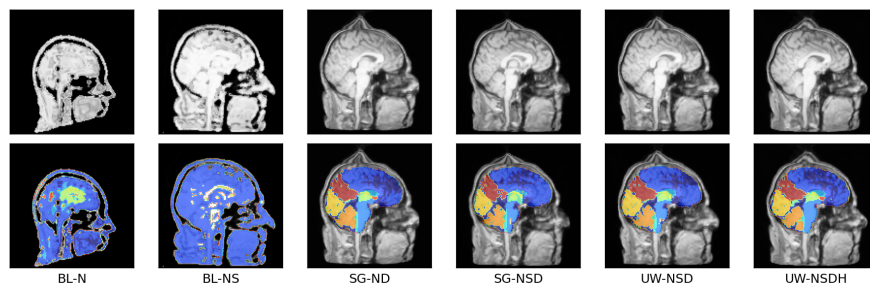

(b) Predictions of the evaluated models on the sample image.

**Figure A. Sample image of the IXI test set, and predictions of the models.**

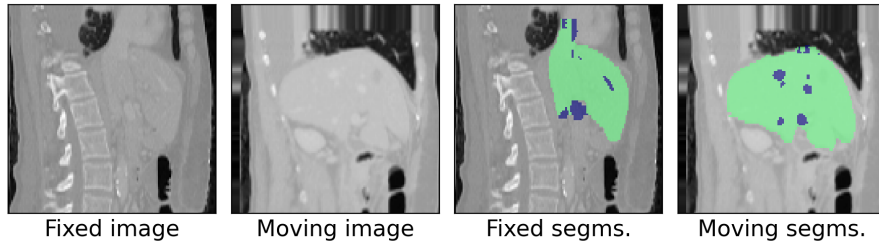

(a) Sample test image.

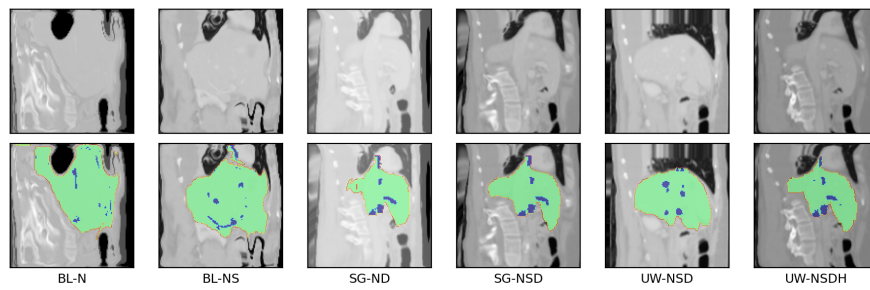

(b) Predictions of the models trained on the Oslo-CoMet dataset.

**Figure B. Sample image of the Oslo-CoMet test set, and predictions of the models trained on the Oslo-CoMet dataset.**

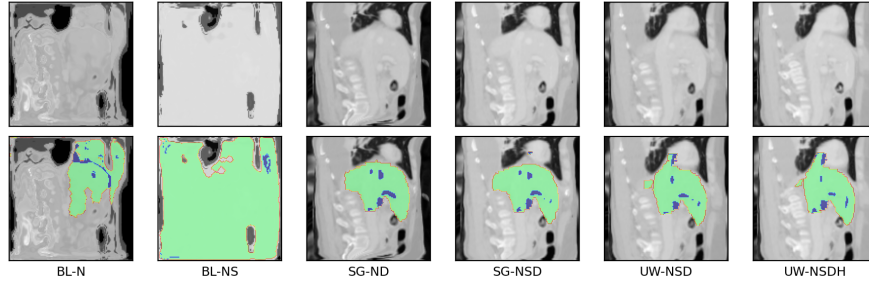

(a) Predictions of the models trained on the Oslo-CoMet dataset from finetuning the entire architecture.

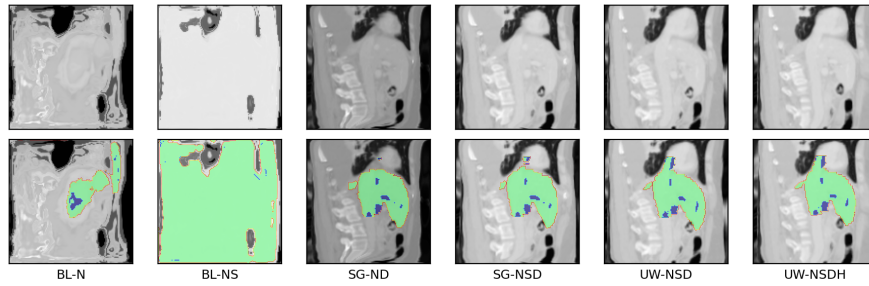

(b) Predictions of the models trained on the Oslo-CoMet dataset from finetuning in two steps.

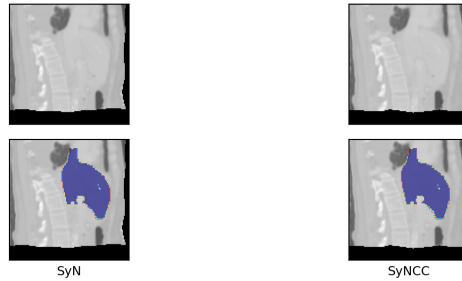

(c) Predictions of the SyN and SyNCC algorithms.

**Figure C. Predictions of the finetuned models and ANTs on the Oslo-CoMet test set sample.**
